# Supplementary material for: Breathing life into fisheries stock assessments with citizen science
Source: PubMed Central journal article supplement — Sci Rep. 2014 Nov 28;4:7249. doi: 10.1038/srep07249 (PMC5384193; doi:10.1038/srep07249), 2014-11-28
Supplement: srep07249-s1.pdf [file srep07249-s1.pdf]

## **Breathing life into fisheries stock assessments with citizen science**

\*Fairclough<sup>1</sup>, D.V., Brown<sup>1</sup>, J.I., Carlish<sup>1</sup>, B., Crisafulli<sup>1</sup>, B.M. and Keay<sup>1</sup>, I.S.

*\*Corresponding author:* David V. Fairclough

*Affiliation:*

<sup>1</sup>Western Australian Fisheries and Marine Research Laboratories, Department of Fisheries,  
Government of Western Australia, P.O. Box 20, North Beach, Western Australia 6920, Australia

*Tel.* +61 8 9203 0205

*Fax.* +61 8 9203 0199

*e.* [david.fairclough@fish.wa.gov.au](mailto:david.fairclough@fish.wa.gov.au)

**Supplementary Table S1. Costs of monitoring program in each year between 2002/03 and 2012/13.** Expenses are shown as numbers of each item except where listed as \$Aus (e.g. promotion). Salaried staff are numbers of full-time equivalents (RS, Research scientist; STO, Senior technical officer; TO, Technical officer; LA, Laboratory assistant). Other costs are number of weekend days incurred on field trips (no. of staff × no. of days), no. of vehicles leased, no. of freezers and field and lab equipment kits purchased/replaced. Promotion includes production staff time and printing costs (including flyers, banners, signs, drink coolers, water bottles, stickers, hats, t-shirts, prize winner flights, web-links, mail-outs, newsletters).

| <b>Expense</b>                   | <b>Detail</b>           | <b>2002/03</b> | <b>2003/04</b> | <b>2004/05</b> | <b>2005/06</b> | <b>2006/07</b> | <b>2007/08</b> | <b>2008/09</b> | <b>2009/10</b> | <b>2010/11</b> | <b>2011/12</b> | <b>2012/13</b> |
|----------------------------------|-------------------------|----------------|----------------|----------------|----------------|----------------|----------------|----------------|----------------|----------------|----------------|----------------|
| <b>Staff</b>                     | <i>RS</i>               | 1              | 1              | 1              | 1              | 1              | 1              | 1              | 1              | 1              | 1              | 1              |
|                                  | <i>STO</i>              |                |                |                |                |                | 2              | 2              | 1              | 1              | 1              | 1              |
|                                  | <i>TO</i>               | 1              | 1              | 2              | 2              | 1.5            | 0.5            | 2              | 2              | 2.3            | 2.3            | 2.3            |
|                                  | <i>LA</i>               | 0.8            | 0.8            | 0.8            | 0.8            | 0.8            | 0.8            | 1              | 1              | 1              | 1              | 1              |
| <b>Weekend field days</b>        |                         | <b>39</b>      | <b>51</b>      | <b>67</b>      | <b>67</b>      | <b>67</b>      | <b>68</b>      | <b>90</b>      | <b>67</b>      | <b>61</b>      | <b>61</b>      | <b>61</b>      |
| <b>Vehicles</b>                  |                         | <b>1</b>       | <b>1</b>       | <b>1</b>       | <b>1</b>       | <b>1</b>       | <b>3</b>       | <b>3</b>       | <b>3</b>       | <b>2.5</b>     | <b>2.5</b>     | <b>2.5</b>     |
| <b>Field &amp; lab equipment</b> | <i>Freezers</i>         |                |                | 3              | 1              | 1              | 2              | 1              | 1              |                |                |                |
|                                  | <i>Electricity (\$)</i> |                |                |                |                |                |                |                |                |                |                | 2000           |
|                                  | <i>Field/Lab kits</i>   | 1              | 0.25           | 0.25           | 0.25           | 0.25           | 2              | 0.5            | 0.5            | 1.5            | 0.75           | 1.5            |
| <b>Promotion (\$)</b>            |                         | 7600           | 9000           | 7600           | 9000           | 7600           | 9000           | 16600          | 11800          | 58450          | 73115          | 37591          |
| <b>Total cost vs 2004/05</b>     |                         |                |                | <b>1.000</b>   | <b>0.995</b>   | <b>0.909</b>   | <b>1.461</b>   | <b>1.539</b>   | <b>1.347</b>   | <b>1.550</b>   | <b>1.555</b>   | <b>1.499</b>   |

**Supplementary Table S2.** Questions, answers and results of an online survey of members of the public about the *Send us your skeletons* program.

| # | Question and answer options                                                                                              | No. of respondents | %          |
|---|--------------------------------------------------------------------------------------------------------------------------|--------------------|------------|
| 1 | <i>Are you already aware of the Send us your skeletons campaign</i>                                                      |                    |            |
|   | No, never heard of it before this survey                                                                                 | 29                 | 11.6       |
|   | Yes, but not sure what it is.                                                                                            | 31                 | 12.4       |
|   | Yes, I think I am pretty clear about what is involved.                                                                   | 189                | 76.0       |
|   |                                                                                                                          | <b>249</b>         | <b>100</b> |
| 2 | <i>If Yes, How often do/have you donated your fish skeletons</i>                                                         |                    |            |
|   | Every month                                                                                                              | 12                 | 5.5        |
|   | Every few months                                                                                                         | 26                 | 11.9       |
|   | Once or twice a year                                                                                                     | 51                 | 23.3       |
|   | Never                                                                                                                    | 130                | 59.3       |
|   |                                                                                                                          | <b>219</b>         | <b>100</b> |
| 3 | <i>If you know about SUYS, but have not donated skeletons, why do you choose not to?<br/>(Multiple answers accepted)</i> |                    |            |
|   | Too hard or inconvenient.                                                                                                | 44                 | 34.4       |
|   | I don't trust the Department of Fisheries researchers.                                                                   | 3                  | 2.3        |
|   | I'm concerned that the Department of Fisheries will use this information to restrict my future fishing.                  | 9                  | 7          |
|   | Don't really understand how this relates to me as a rec fisher.                                                          | 8                  | 6.3        |
|   | Other                                                                                                                    | 77                 | 60.2       |
|   |                                                                                                                          | <b>141</b>         |            |
| 4 | <i>If you know about SUYS, are there any other comments you would like to make about the campaign?</i>                   |                    |            |
|   | Supportive of SUYS/Department and understand the need                                                                    | 52                 | 42.3       |
|   | Unsupportive                                                                                                             | 2                  | 1.6        |
|   | Other                                                                                                                    | 69                 | 56.1       |
|   |                                                                                                                          | <b>123</b>         | <b>100</b> |
| 5 | <i>How often do you go fishing?</i>                                                                                      |                    |            |
|   | At least once a month                                                                                                    | 181                | 73         |
|   | Every few months                                                                                                         | 49                 | 19.8       |
|   | Once or twice a year                                                                                                     | 13                 | 5.2        |
|   | Less than once a year                                                                                                    | 5                  | 2          |
|   |                                                                                                                          | <b>248</b>         | <b>100</b> |
| 6 | <i>Would you be happy to receive further information about the Send us your skeletons campaign</i>                       |                    |            |
|   | Yes                                                                                                                      | 199                | 80.6       |
|   | No                                                                                                                       | 48                 | 19.4       |
|   |                                                                                                                          | <b>247</b>         | <b>100</b> |
